# Supplementary material for: Knowledge and Perceptions about COVID-19 among Health Care Workers: Evidence from COVID-19 Hospitals during the Second Pandemic Wave
Source: MDPI journal article supplement (doi:10.3390/tropicalmed6030136), 2021-07-19
Supplement: s1 [file s1]

Supplementary Table S1. Medical doctors' specialties.

| Specialty               | N (% among responders) |
|-------------------------|------------------------|
| Internal Medicine       | 18 (18.4)              |
| General Surgery         | 15 (15.3)              |
| Pulmonary Medicine      | 11 (11.2)              |
| Hematology              | 9 (9.2)                |
| Obstetrics – Gynecology | 6 (6.1)                |
| Nephrology              | 6 (6.1)                |
| Neurology               | 5 (5.1)                |
| General Medicine        | 4 (4.1)                |
| Cardiology              | 4 (4.1)                |
| Gastroenterology        | 3 (3.1)                |
| Endocrinology           | 3 (3.1)                |
| Orthopedics             | 3 (3.1)                |
| Pediatrics              | 2 (2)                  |
| Dermatology             | 2 (2)                  |

|                                      |       |
|--------------------------------------|-------|
| Urology                              | 1 (1) |
| Nuclear Medicine                     | 1 (1) |
| Microbiology & Laboratory Medicine   | 1 (1) |
| Oncology                             | 1 (1) |
| Cardiac surgery                      | 1 (1) |
| Neurosurgery                         | 1 (1) |
| Intensive Care & Infectious Diseases | 1 (1) |
| NR                                   | 16    |

NR: not reported
